# Supplementary material for: Morphological variation of anatase TiO2crystals via formation of titanium glycerolate precursors under microwave irradiation
Source: Royal Society of Chemistry journal article supplement (doi:10.1039/c5ce00257e), 2015-01-01
Supplement: c5ce00257e1.pdf [file c5ce00257e1.pdf]

†Electronic Supplementary Information

**Morphological Variation of Anatase TiO<sub>2</sub> Crystals *via* Forming  
Titanium Glycerolate Precursors under Microwave Irradiation**

*Hyung-Bae Kim and Du-Jeon Jang\**

Department of Chemistry, Seoul National University, NS60, Seoul 151-747, Korea

E-mail: [djjang@snu.ac.kr](mailto:djjang@snu.ac.kr)

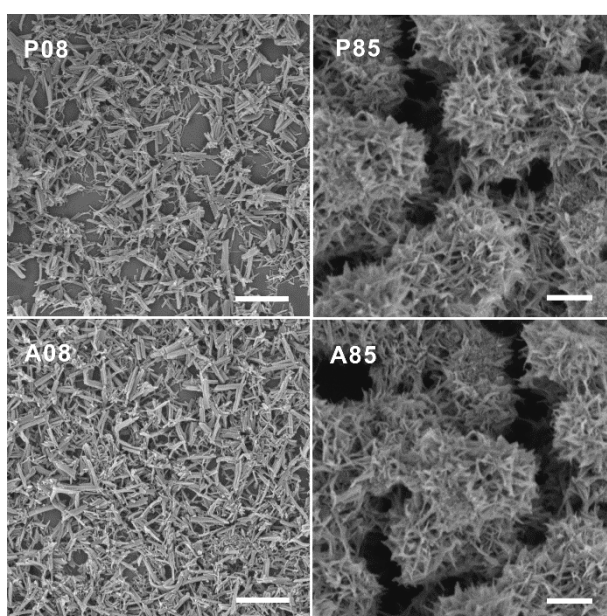

**Fig. S1** SEM images of indicated titanium glycerolate (top) and anatase TiO<sub>2</sub> crystals (bottom). Each scale bar indicates 1 μm.

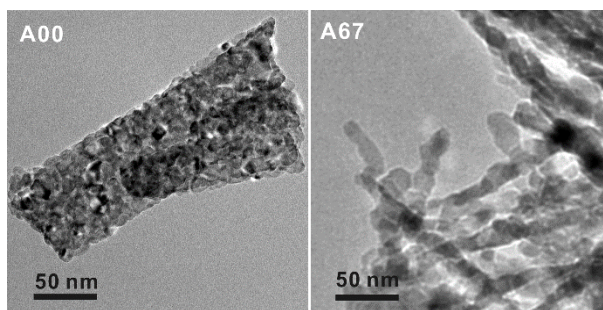

**Fig. S2** TEM images of indicated anatase TiO<sub>2</sub> crystals.

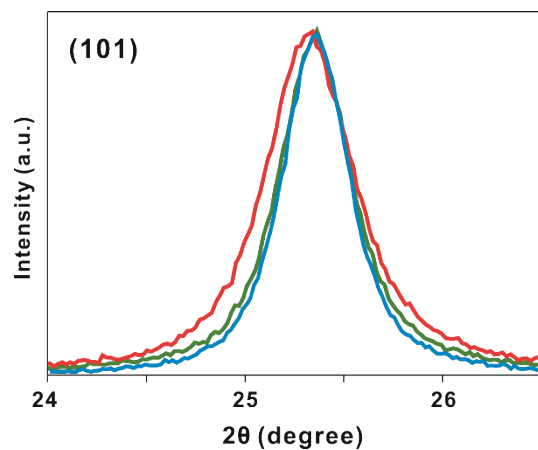

**Fig. S3** Maximum-normalized (101) HRXRD peaks of anatase  $\text{TiO}_2$  crystals A00 (red), A20 (green), and A67 (blue).

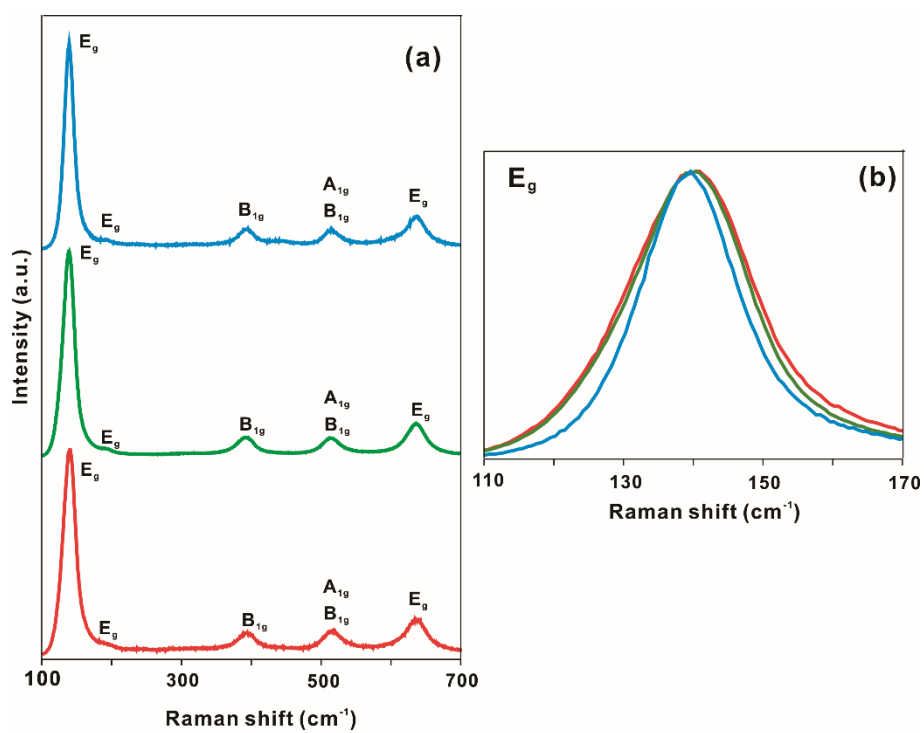

**Fig. S4** Raman spectra (a) and maximum-normalized lowest- $E_g$  Raman peaks (b) for the anatase  $\text{TiO}_2$  crystals of A00 (red), A20 (green), and A67 (blue).

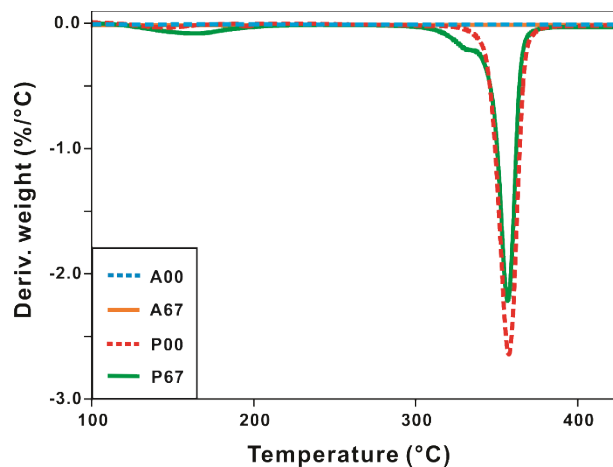

**Fig. S5** First-derivative TGA curves of indicated titanium glycerolate precursors and anatase TiO<sub>2</sub> crystals.

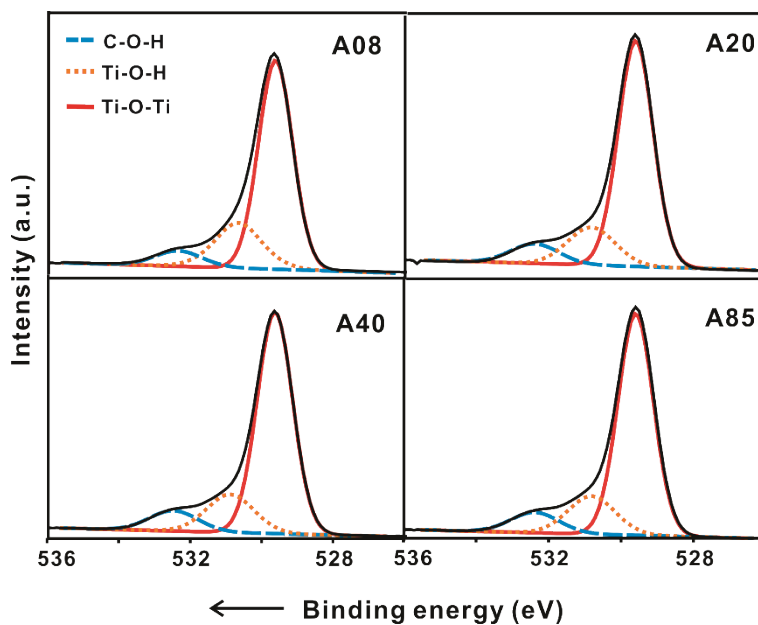

**Fig. S6** O 1s XPS spectra of indicated anatase TiO<sub>2</sub> crystals. Each XPS spectrum has been deconvoluted into three Gaussian curves arising from indicated oxygen environments.

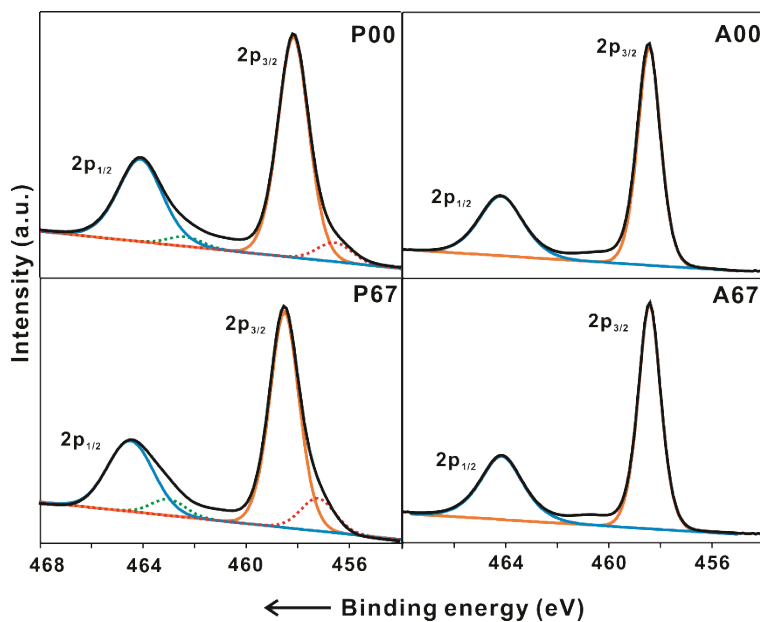

**Fig. S7** Ti 2p XPS spectra of indicated titanium glycerolate precursors (left) and anatase TiO<sub>2</sub> crystals (right). Each XPS spectrum has been deconvoluted into Gaussian curves of Ti<sup>4+</sup> (solid) and Ti<sup>3+</sup> (dotted).

**Table S1** Binding Energies in eV for the Overall and the Deconvoluted Curves of O 1s XPS Spectra

| sample | overall | C-O-H                    | Ti-O-C      | Ti-O-H         | Ti-O-Ti     |
|--------|---------|--------------------------|-------------|----------------|-------------|
| P00    | 531.0   | 532.5 (15%) <sup>a</sup> | 531.0 (80%) | - <sup>b</sup> | 529.8 (5%)  |
| P67    | 531.4   | 532.8 (14%)              | 531.5 (68%) | 530.8 (10%)    | 529.7 (8%)  |
| A00    | 529.7   | 532.4 (7%)               | -           | 530.7 (22%)    | 529.7 (71%) |
| A08    | 529.7   | 532.5 (8%)               | -           | 530.9 (18%)    | 529.7 (74%) |
| A20    | 529.7   | 532.5 (8%)               | -           | 530.9 (18%)    | 529.7 (74%) |
| A40    | 529.7   | 532.5 (8%)               | -           | 530.9 (18%)    | 529.7 (74%) |
| A67    | 529.7   | 532.5 (9%)               | -           | 530.9 (17%)    | 529.7 (74%) |
| A85    | 529.7   | 532.5 (9%)               | -           | 530.9 (17%)    | 529.7 (74%) |

<sup>a</sup>Area percentage of each peak. <sup>b</sup>Not observed.

**Table S2 Binding Energies in eV for the Deconvoluted Curves of Ti 2p XPS Spectra**

| sample | Ti <sup>4+</sup> 2p <sub>1/2</sub> | Ti <sup>3+</sup> 2p <sub>1/2</sub> | Ti <sup>4+</sup> 2p <sub>3/2</sub> | Ti <sup>3+</sup> 2p <sub>3/2</sub> | f(Ti <sup>3+</sup> ) <sup>a</sup> |
|--------|------------------------------------|------------------------------------|------------------------------------|------------------------------------|-----------------------------------|
| P00    | 464.1 <sup>a</sup>                 | 462.4                              | 458.2                              | 456.6                              | 0.08                              |
| P67    | 464.6                              | 463.1                              | 458.6                              | 457.3                              | 0.15                              |
| A00    | 464.1                              | - <sup>b</sup>                     | 458.4                              | -                                  | 0.00                              |
| A67    | 464.1                              | -                                  | 458.4                              | -                                  | 0.00                              |

<sup>a</sup>Fraction of Ti<sup>3+</sup> peaks. <sup>b</sup>Not observed.

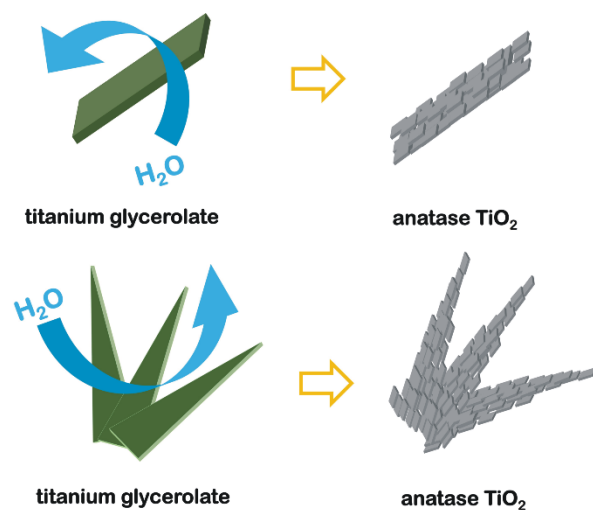

**Fig. S8** Schematic illustration for the conversion of indicated titanium glycerolate precursors to anatase TiO<sub>2</sub> crystals *via* microwave-assisted hydrolysis.
